# Supplementary material
Source: publisher figshare collection journal article supplement (https://tandf.figshare.com/ndownloader/files/13238378)
Supplement: Supplementary file 1 [file 13238378]

**SUPPLEMENTARY INFORMATION**


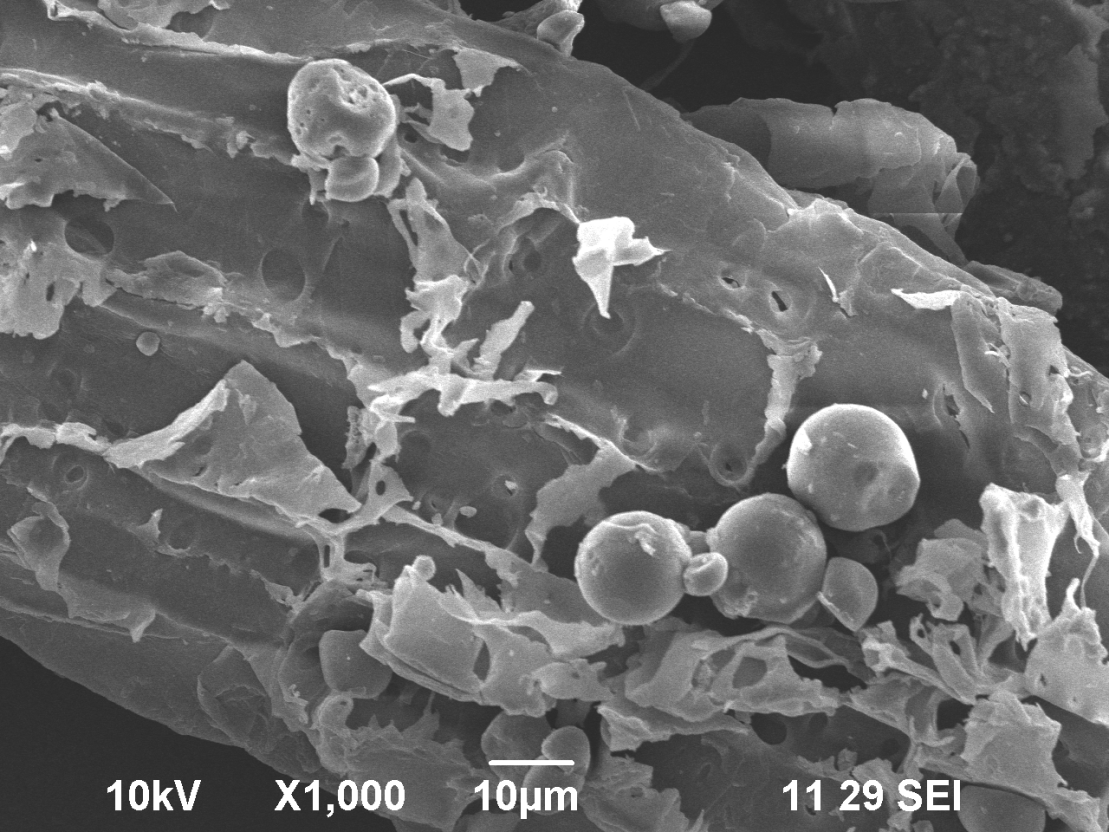


**Figure S1. Scanning electron micrograph of cassava bagasse**


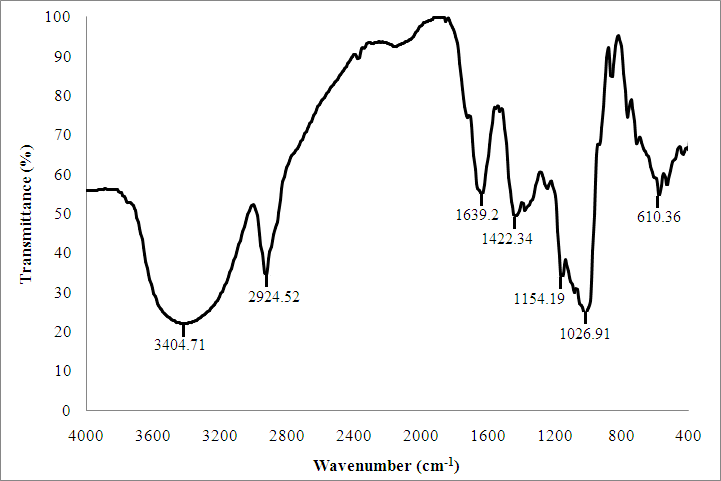


**Figure 2. FTIR spectra of cassava bagasse**
